# Supplementary material for: Healthcare Providers’ Perception and Barriers Concerning the Use of Telehealth Applications in Saudi Arabia: A Cross-Sectional Study
Source: MDPI journal article supplement (doi:10.3390/healthcare10081527), 2022-08-13

**Figure S1:** Common Barriers of using Telehealth Applications per Profession among Non-users.

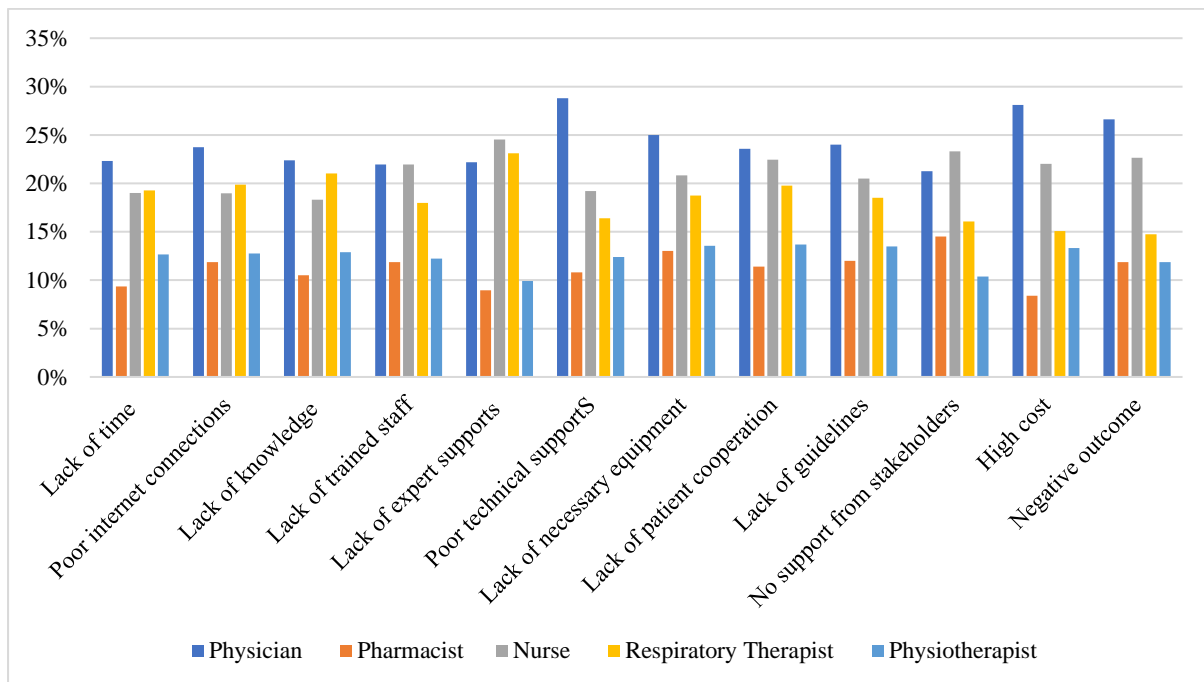

**Figure S2:** Common Barriers Among those who Used Telehealth per Profession.

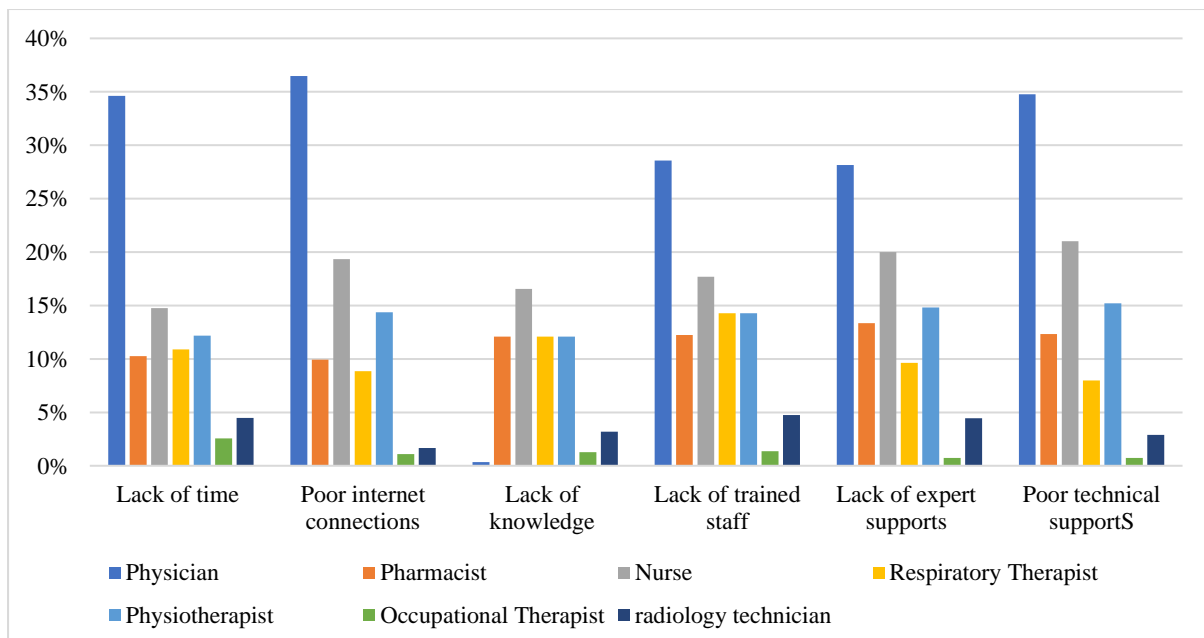

Supplement: s1 [file s1]
